# Supplementary material
Source: Springer Nature journal article supplement (https://www.springermedizin.de/resource/supplementary/12893_2010_170_MOESM1_ESM.pdf/9511714)
Supplement: MOESM1 [file 9511714]

Clinical suspicion of diverticulitis

```
graph TD; A[Clinical suspicion of diverticulitis] --> B[For diagnosis and inclusion:  
acute US or CT  
For staging:  
CT within 24 hours]; B --> C[Hinchey 1a or 1b  
(uncomplicated diverticulitis)]; C --> D[Inclusion DIABOLO trial]; D --> E[Conservative strategy WITH antibiotics]; D --> F[Liberal strategy WITHOUT antibiotics];
```

For diagnosis and inclusion:  
acute US or CT  
For staging:  
CT within 24 hours

Hinchey 1a or 1b  
(uncomplicated diverticulitis)

**Inclusion DIABOLO trial**

Conservative strategy WITH  
antibiotics

Liberal strategy WITHOUT  
antibiotics
